# Supplementary material for: Lattice capacity-dependent activity for CO2 methanation: crafting Ni/CeO2 catalysts with outstanding performance at low temperatures
Source: Royal Society of Chemistry journal article supplement (doi:10.1039/d4nr01409j), 2024-01-01
Supplement: d4nr01409j1.pdf [file d4nr01409j1.pdf]

## Supporting information

### **Lattice capacity-dependent activity for CO<sub>2</sub> methanation: Crafting Ni/CeO<sub>2</sub> catalysts with outstanding performance at low temperatures**

Kun Liu<sup>b,\*</sup>, Yixin Liao<sup>a</sup>, Peng Wang<sup>c</sup>, Xiuzhong Fang<sup>a</sup>, Jia Zhu<sup>d</sup>, Guangfu Liao<sup>e,\*</sup>  
Xianglan Xu<sup>a,\*</sup>

<sup>a</sup> Key Laboratory of Jiangxi Province for Environment and Energy Catalysis, Institute of Rare Earths, School of Chemistry and Chemical Engineering, Nanchang University, Nanchang, Jiangxi 330031, China

<sup>b</sup> School of Resources and Environment, Nanchang University, 999 Xuefu Road, Nanchang, Jiangxi, 330031, China

<sup>c</sup> Shandong Chambroad Petrochemicals Co., Ltd, Binzhou, Shandong 256500, China

<sup>d</sup> College of Chemistry and Chemical Engineering, Jiangxi Normal University, Nanchang, Jiangxi 330022, China

<sup>e</sup> College of Materials Engineering, Fujian Agriculture and Forestry University, Fuzhou 350002, China

\* Corresponding author. E-mail: [liukun@ncu.edu.cn](mailto:liukun@ncu.edu.cn) (K. Liu); [liaogf@mail2.sysu.edu.cn](mailto:liaogf@mail2.sysu.edu.cn) (G. Liao); [xuxianglan@ncu.edu.cn](mailto:xuxianglan@ncu.edu.cn) (X. Xu).

## Content

|                             |   |
|-----------------------------|---|
| Table of content.....       | 2 |
| S1. Supporting Figures..... | 2 |
| S2. Supporting Tables ..... | 6 |
| S2. Referees.....           | 8 |

## S1. Supporting Figures

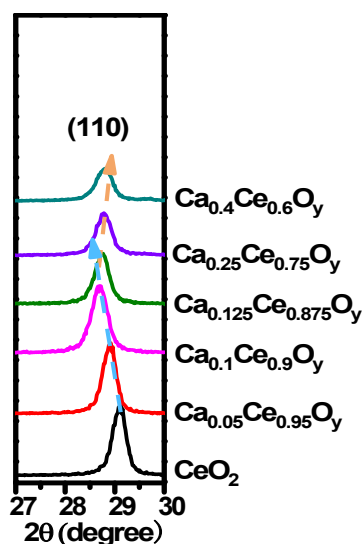

**Fig. S1.** The partial enlarged XRD patterns of the  $\text{Ca}_x\text{Ce}_{1-x}\text{O}_y$  support. When Ca ions are introduced into the  $\text{CeO}_2$  lattice, the larger size of Ca ions compared to Ce ions leads to an increased interlayer spacing within the crystal lattice. As a result, the  $2\theta$  angle shifts towards lower angles. Furthermore, as the Ca doping concentration increases, the interlayer spacing expands further, with the greatest shift in  $2\theta$  angle occurring at a specific threshold doping level (see **Table 1**).

$\text{N}_2$  sorption analysis was performed to explore the textural characteristics of  $\text{Ni}/\text{Ca}_x\text{Ce}_{1-x}\text{O}_y$  (**Fig. S2, Table S1**). All the catalysts displayed Type IV isotherm, along with an H3-type hysteresis loop in the relative pressure range of 0.7-1.0, indicating the presence of interparticle piled mesopores. The average pore diameters showed a relatively increasing trend, while the mean pore volumes decreased due to the

introduction of calcium. Generally, all these samples exhibited relatively similar values; therefore, it was a reasonable deduction to infer that variations in surface area did not substantially impact the catalysts' performance.

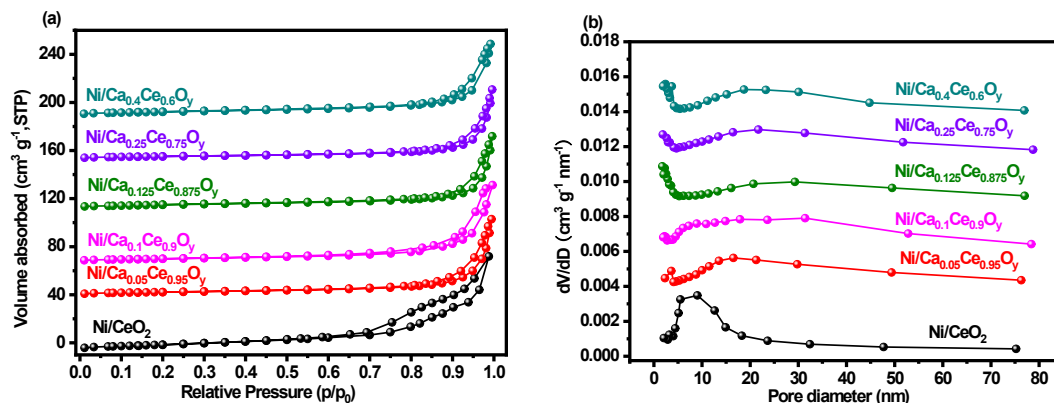

**Fig. S2.** (a) N<sub>2</sub> sorption isotherms and (b) pore-size distributions profiles of the Ni/Ca<sub>x</sub>Ce<sub>1-x</sub>O<sub>y</sub> catalysts. All these samples exhibited relatively similar values, and the variations in surface area did not substantially impact the catalysts' performance (see Table S1).

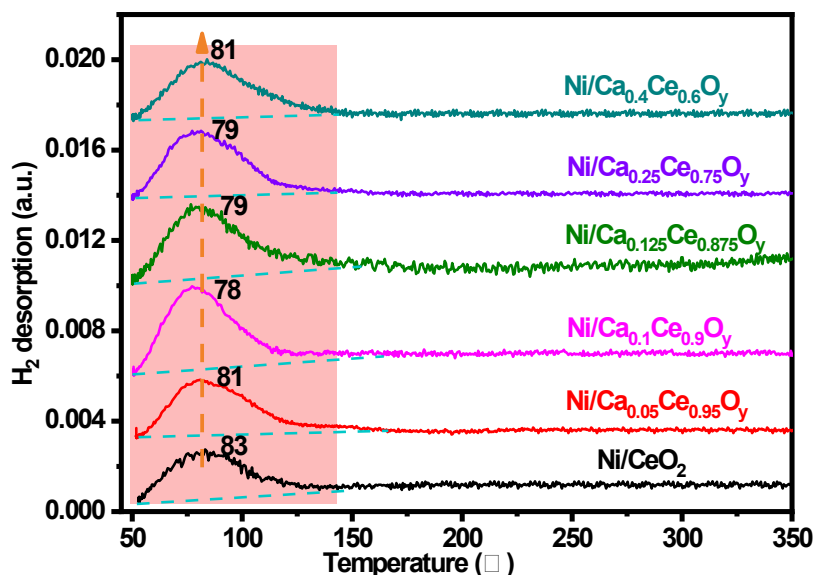

**Fig. S3.** The H<sub>2</sub> adsorption-desorption profiles on the freshly reduced Ni/Ca<sub>x</sub>Ce<sub>1-x</sub>O<sub>y</sub> catalysts. The pure solid solutions can form beneficial catalytic interfaces, enhancing the dispersion of nickel (see Table 2).

The crystalline phases of the fresh, reduced, and spent catalysts have been assessed through X-ray diffraction analysis. (Fig.S4 and Table S1). As portrayed in Fig. S4a,

except diffraction peaks of  $\text{Ca}_x\text{Ce}_{1-x}\text{O}_y$ , the characteristic diffraction peaks of NiO crystallites were detected in all NiO/ $\text{Ca}_x\text{Ce}_{1-x}\text{O}_y$  catalysts. In contrast, the NiO has been completely reduced to Ni among the reduced Ni/ $\text{Ca}_x\text{Ce}_{1-x}\text{O}_y$  catalysts, as testified by the detected metallic Ni phase (**Fig. S4b**). And the NiO crystal sizes were calculated (**Table S2**). The fresh NiO crystallite sizes in the NiO/ $\text{Ca}_x\text{Ce}_{1-x}\text{O}_y$  catalysts were found to be smaller compared to those in the fresh NiO/ $\text{CeO}_2$  catalyst, illustrating that the incorporation of the calcium can significantly improve the synergy between NiO and the  $\text{Ca}_x\text{Ce}_{1-x}\text{O}_y$ , although the  $\text{Ca}_x\text{Ce}_{1-x}\text{O}_y$  supports possessed the comparable specific surface area to the  $\text{CeO}_2$  support (**Table S1**). After subjecting the material to  $\text{H}_2$  reduction, the size of metallic Ni crystallites in the reduced materials Ni/ $\text{Ca}_x\text{Ce}_{1-x}\text{O}_y$  (i.e., 15.5-17.7 nm) catalysts were smaller than reduced Ni/ $\text{CeO}_2$  (i.e., 19.4 nm). The catalyst Ni/ $\text{Ca}_{0.1}\text{Ce}_{0.9}\text{O}_y$ , with a particle size of 15.5 nm, stood out for having the most diminutive Ni crystallite size. Compared to the freshly, reduced samples, both the spent Ni/ $\text{Ca}_x\text{Ce}_{1-x}\text{O}_y$  and Ni/ $\text{CeO}_2$  catalysts exhibited similar XRD diffraction patterns. The crystallite sizes of metallic nickel in the used Ni/ $\text{CeO}_2$  with an obvious incensement (+17.0%) in contrast to the catalyst that has undergone reduction, which showcased the aggregation and increase in size of the nickel particles throughout the entire  $\text{CO}_2$  methanation reaction. However, there were no obvious incensement can be found the metallic Ni crystallite sizes for these used samples Ni/ $\text{Ca}_x\text{Ce}_{1-x}\text{O}_y$ , showing that the addition of the calcium was able to hinder the agglomeration of nickel grains during the reaction. The effectiveness of a supported metal catalyst in driving reactions hinges significantly on two key factors: metal dispersion and the surface area of the active metal<sup>[1-3]</sup>. Thus, the reduced Ni/ $\text{Ca}_x\text{Ce}_{1-x}\text{O}_y$  catalysts have been subjected to analysis through  $\text{H}_2$ -TPD (**Fig. S3 and Table 2**). The active metallic Ni surface areas and dispersion obeying the tendency of Ni/ $\text{Ca}_{0.1}\text{Ce}_{0.9}\text{O}_y > \text{Ni}/\text{Ca}_{0.125}\text{Ce}_{0.875}\text{O}_y > \text{Ni}/\text{Ca}_{0.25}\text{Ce}_{0.75}\text{O}_y > \text{Ni}/\text{Ca}_{0.05}\text{Ce}_{0.95}\text{O}_y > \text{Ni}/\text{Ca}_{0.4}\text{Ce}_{0.6}\text{O}_y > \text{Ni}/\text{CeO}_2$ . The analysis suggests that solid solutions can form beneficial catalytic interfaces, enhancing the dispersion of nickel (**see Table S2**).

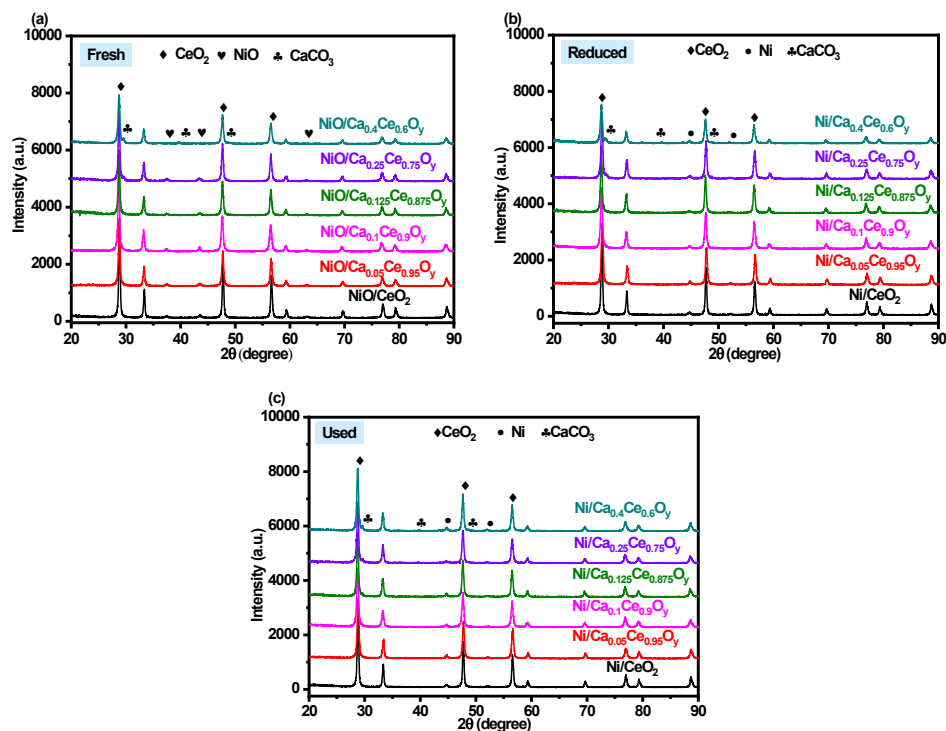

**Fig. S4.** X-ray diffraction patterns for the catalysts in their fresh, reduced, and spent states. The pure solid solutions can form beneficial catalytic interfaces, enhancing the dispersion of nickel, inhibiting of grain growth.

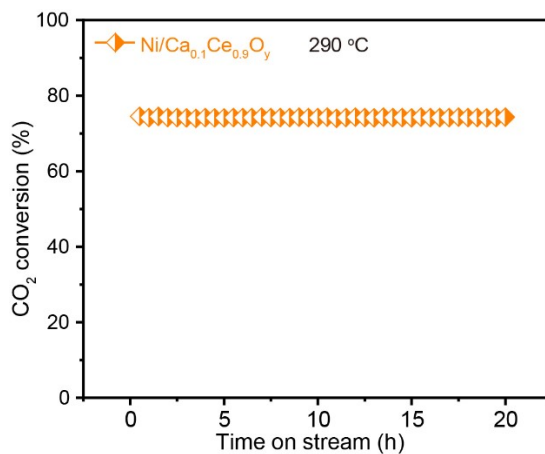

**Fig. S5.** Stability test diagram of Ni/Ca<sub>0.1</sub>Ce<sub>0.9</sub>O<sub>y</sub> catalyst at 290 °C for 20 h

## S2. Supporting Tables

**Table S1** Physicochemical properties of Ni/Ca<sub>x</sub>Ce<sub>1-x</sub>O<sub>y</sub> catalysts.

| Catalysts                                                 | S <sub>BET</sub> <sup>[a]</sup> | Pore volume<br>(cm <sup>3</sup> g <sup>-1</sup> ) | Average pore size<br>(nm) |
|-----------------------------------------------------------|---------------------------------|---------------------------------------------------|---------------------------|
| Ni/CeO <sub>2</sub>                                       | 21                              | 0.12                                              | 13.8                      |
| Ni/Ca <sub>0.05</sub> Ce <sub>0.95</sub> O <sub>y</sub>   | 17                              | 0.13                                              | 23.1                      |
| Ni/Ca <sub>0.1</sub> Ce <sub>0.9</sub> O <sub>y</sub>     | 18                              | 0.11                                              | 22.0                      |
| Ni/Ca <sub>0.125</sub> Ce <sub>0.875</sub> O <sub>y</sub> | 16                              | 0.12                                              | 24.5                      |
| Ni/Ca <sub>0.25</sub> Ce <sub>0.75</sub> O <sub>y</sub>   | 16                              | 0.10                                              | 26.5                      |
| Ni/Ca <sub>0.4</sub> Ce <sub>0.6</sub> O <sub>y</sub>     | 15                              | 0.092                                             | 25.2                      |

**Table S2** The nickel species crystallite sizes of Ni/Ca<sub>x</sub>Ce<sub>1-x</sub>O<sub>y</sub> catalysts

| Catalysts                                                 | Fresh catalysts                             | Reduced catalysts                          | Spent catalysts                            |
|-----------------------------------------------------------|---------------------------------------------|--------------------------------------------|--------------------------------------------|
|                                                           | NiO crystallite size<br>(nm) <sup>[a]</sup> | Ni crystallite size<br>(nm) <sup>[a]</sup> | Ni crystallite size<br>(nm) <sup>[a]</sup> |
| Ni/CeO <sub>2</sub>                                       | 18.0                                        | 19.4                                       | 22.7                                       |
| Ni/Ca <sub>0.05</sub> Ce <sub>0.95</sub> O <sub>y</sub>   | 16.3                                        | 17.0                                       | 17.3                                       |
| Ni/Ca <sub>0.1</sub> Ce <sub>0.9</sub> O <sub>y</sub>     | 15.5                                        | 15.5                                       | 15.7                                       |
| Ni/Ca <sub>0.125</sub> Ce <sub>0.875</sub> O <sub>y</sub> | 15.8                                        | 15.9                                       | 16.1                                       |
| Ni/Ca <sub>0.25</sub> Ce <sub>0.75</sub> O <sub>y</sub>   | 16.5                                        | 17.1                                       | 17.4                                       |
| Ni/Ca <sub>0.4</sub> Ce <sub>0.6</sub> O <sub>y</sub>     | 16.8                                        | 17.7                                       | 18.0                                       |

<sup>[a]</sup>Calculated from of the XRD patterns

**Table S3** Quantified H<sub>2</sub>-TPR results of the Ca<sub>x</sub>Ce<sub>1-x</sub>O<sub>y</sub> support and fresh Ni/Ca<sub>x</sub>Ce<sub>1-x</sub>O<sub>y</sub> catalysts.

| Support                                                | H <sub>2</sub> Consumption               |  | Catalyst                                                  | H <sub>2</sub> Consumption               |                      |
|--------------------------------------------------------|------------------------------------------|--|-----------------------------------------------------------|------------------------------------------|----------------------|
|                                                        | at 400-550 °C<br>(mmol g <sup>-1</sup> ) |  |                                                           | at 200-500 °C<br>(mmol g <sup>-1</sup> ) | H/Ni<br>atomic ratio |
| CeO <sub>2</sub>                                       | 0.064                                    |  | Ni/CeO <sub>2</sub>                                       | 1.71                                     | 2.01                 |
| Ca <sub>0.05</sub> Ce <sub>0.95</sub> O <sub>y</sub>   | 0.068                                    |  | Ni/Ca <sub>0.05</sub> Ce <sub>0.95</sub> O <sub>y</sub>   | 1.72                                     | 2.02                 |
| Ca <sub>0.1</sub> Ce <sub>0.9</sub> O <sub>y</sub>     | 0.074                                    |  | Ni/Ca <sub>0.1</sub> Ce <sub>0.9</sub> O <sub>y</sub>     | 1.74                                     | 2.05                 |
| Ca <sub>0.125</sub> Ce <sub>0.875</sub> O <sub>y</sub> | 0.072                                    |  | Ni/Ca <sub>0.125</sub> Ce <sub>0.875</sub> O <sub>y</sub> | 1.73                                     | 2.04                 |
| Ca <sub>0.25</sub> Ce <sub>0.75</sub> O <sub>y</sub>   | 0.068                                    |  | Ni/Ca <sub>0.25</sub> Ce <sub>0.75</sub> O <sub>y</sub>   | 1.73                                     | 2.03                 |
| Ca <sub>0.4</sub> Ce <sub>0.6</sub> O <sub>y</sub>     | 0.066                                    |  | Ni/Ca <sub>0.4</sub> Ce <sub>0.6</sub> O <sub>y</sub>     | 1.72                                     | 2.02                 |

**Table S4** The quantification results of oxygen properties.

| Catalysts                                              | I <sub>576</sub> /I <sub>460</sub> <sup>[a]</sup> | I <sub>1072</sub> /I <sub>460</sub> <sup>[a]</sup> |
|--------------------------------------------------------|---------------------------------------------------|----------------------------------------------------|
|                                                        | (×10 <sup>-2</sup> )                              | (×10 <sup>-2</sup> )                               |
| CeO <sub>2</sub>                                       | 1.10                                              | 1.26                                               |
| Ca <sub>0.05</sub> Ce <sub>0.95</sub> O <sub>y</sub>   | 3.21                                              | 2.55                                               |
| Ca <sub>0.1</sub> Ce <sub>0.9</sub> O <sub>y</sub>     | 4.73                                              | 3.45                                               |
| Ca <sub>0.125</sub> Ce <sub>0.875</sub> O <sub>y</sub> | 3.54                                              | 2.66                                               |
| Ca <sub>0.25</sub> Ce <sub>0.75</sub> O <sub>y</sub>   | 3.08                                              | 2.47                                               |
| Ca <sub>0.4</sub> Ce <sub>0.6</sub> O <sub>y</sub>     | 2.98                                              | 2.26                                               |

<sup>[a]</sup>Calculated from of the Raman results**Table S5** The quantified CO<sub>2</sub>-TPD results on the reduced Ni/Ca<sub>x</sub>Ce<sub>1-x</sub>O<sub>y</sub> catalysts.

| Catalysts                                                 | O <sub>2</sub> <sup>-</sup> /<br>(O <sub>2</sub> <sup>-</sup><br>+O <sup>2-</sup> )<br>(%) <sup>[a]</sup> | Ce <sup>3+</sup> /<br>(Ce <sup>3+</sup><br>Ce <sup>4+</sup> )<br>(%) <sup>[a]</sup> | Ca/<br>(Ce+Ca)<br>molar<br>ratio <sup>[a]</sup> | Weak<br>alkaline<br>site amount<br>(μmol m <sup>-2</sup> ) <sup>[b]</sup> | Moderate<br>alkaline<br>site amount<br>(μmol m <sup>-2</sup> ) <sup>[b]</sup> | Total amount<br>below<br>450 °C<br>(μmol m <sup>-2</sup> ) <sup>[b]</sup> |
|-----------------------------------------------------------|-----------------------------------------------------------------------------------------------------------|-------------------------------------------------------------------------------------|-------------------------------------------------|---------------------------------------------------------------------------|-------------------------------------------------------------------------------|---------------------------------------------------------------------------|
|                                                           | Ni/CeO <sub>2</sub>                                                                                       | 17.2                                                                                | 19.8                                            | -                                                                         | 1.14                                                                          | 1.20                                                                      |
| Ni/Ca <sub>0.05</sub> Ce <sub>0.95</sub> O <sub>y</sub>   | 25.6                                                                                                      | 25.2                                                                                | 0.088                                           | 1.01                                                                      | 2.09                                                                          | 3.10                                                                      |
| Ni/Ca <sub>0.1</sub> Ce <sub>0.9</sub> O <sub>y</sub>     | 38.6                                                                                                      | 29.6                                                                                | 0.13                                            | 1.87                                                                      | 3.03                                                                          | 4.90                                                                      |
| Ni/Ca <sub>0.125</sub> Ce <sub>0.875</sub> O <sub>y</sub> | 30.4                                                                                                      | 28.0                                                                                | 0.21                                            | 0.93                                                                      | 2.44                                                                          | 3.37                                                                      |
| Ni/Ca <sub>0.25</sub> Ce <sub>0.75</sub> O <sub>y</sub>   | 23.5                                                                                                      | 22.5                                                                                | 0.43                                            | 1.15                                                                      | 1.86                                                                          | 3.01                                                                      |
| Ni/Ca <sub>0.4</sub> Ce <sub>0.6</sub> O <sub>y</sub>     | 21.9                                                                                                      | 21.4                                                                                | 0.78                                            | 1.07                                                                      | 1.67                                                                          | 2.74                                                                      |

<sup>[a]</sup>Measured by XPS.<sup>[b]</sup>Measured by CO<sub>2</sub>-TPD.

### S3. Referees

- [1] Liu, K.; Xu, X.; Xu, J.; Fang, X.; Liu, L.; Wang, X., *J. CO<sub>2</sub> Util.* **2020**, *38*, 113-124.
- [2] Xu, X.; Liu, L.; Tong, Y.; Fang, X.; Xu, J.; Jiang, D.; Wang, X., *ACS Catal.* **2021**, *11*, 5762-5775.
- [3] Zhang, Z.; Tong, Y.; Fang, X.; Xu, J.; Xu, X.; Wang, X., *Fuel* **2022**, *316*, 123191.
